# Supplementary material
Source: Royal Society of Chemistry journal article supplement (doi:10.1039/d6nr00280c)
Supplement: d6nr00280c1.pdf [file d6nr00280c1.pdf]

## Supplementary Information

### Engineered $\text{Co}_3\text{O}_4$ Nanoboxes Boost Luminol Chemiluminescence for Selective $\text{Mn}^{2+}$ Sensing

Tsegu Lijalem<sup>1,2</sup>, Tadele Eticha<sup>1,2</sup>, Ala'a Mhmoued Abdllh Alboull<sup>1,2</sup>, Muhammad Rehan Hasan Shah Gilani<sup>3</sup>, Fathimath Abbas<sup>1,2</sup>, Jiyang Liu<sup>1,2</sup>, Baohua Lou<sup>1\*</sup>, and Guobao Xu<sup>1,2\*</sup>

<sup>1</sup> State Key Laboratory of Electroanalytical Chemistry, Changchun Institute of Applied Chemistry, Chinese Academy of Sciences, Changchun 130022, China

<sup>2</sup> School of Applied Chemistry and Engineering, University of Science and Technology of China, Hefei 230026, China

<sup>3</sup> Institute of Chemical Sciences, Bahauddin Zakariya University, Multan, Pakistan

Corresponding author: guobaoxu@ciac.ac.cn (GB Xu), loubh@ciac.ac.cn (BH Lou)

### Table of Contents

#### Chemicals

#### Instruments

**Scheme S1** Digitally captured images showing the chemical etching procedure for ZIF-67 MOF modification

**Fig. S1** SEM images of TA-Co complex NBs.

**Fig. S2** SEM images for TA-unmodified  $\text{Co}_3\text{O}_4$ .

**Fig. S3** FT-IR spectrum of TA.

**Fig. S4** Co 2p high-resolution XPS deconvoluted spectra of (a) ZIF-67 NCs and (b) TA-unmodified  $\text{Co}_3\text{O}_4$ .

#### Optimisation of Chemiluminescence Conditions

**Fig. S5** Optimization of experimental conditions.

**Fig. S6** Electron spin resonance

## Chemicals

Co(NO<sub>3</sub>)<sub>2</sub>•6H<sub>2</sub>O, 3,3,5,5'-tetramethyl-benzidine (TMB) and 2-methylimidazole (2-MIm) were purchased from Aladdin (Shanghai, China). Tannic acid, luminol, superoxide dismutase (SOD) and NaN<sub>3</sub> were purchased from Sinopharm Chemical Reagent Co., Ltd, Ark Pharm (Illinois, USA), and Beijing HWRK Chem. Co., Ltd (Beijing, China) and Tianjin Fuchen Chemical Reagent Factory (Tianjin, China), respectively. MnSO<sub>4</sub>•H<sub>2</sub>O, KCl, CaCl<sub>2</sub>, MgSO<sub>4</sub>, CuSO<sub>4</sub>•5H<sub>2</sub>O, and H<sub>2</sub>O<sub>2</sub> were supplied by Beijing Chemical Works (Beijing, China). NaCO<sub>3</sub> anhydrous and NaHCO<sub>3</sub> were purchased from Beijing Beihua Fine Chemicals Co., Ltd (Beijing, China). Thiourea and Cr(NO<sub>3</sub>)<sub>3</sub>•9H<sub>2</sub>O were supplied from Xilong Chemical Co., Ltd. (Guang dong, China). Luminol (10 mM) was prepared using a 0.10 M NaOH aqueous solution and kept at 4 °C in a dark-coloured bottle for two weeks prior to use. Carbonate buffer solutions (CBS, 0.10 M) in different pH levels were prepared with NaCO<sub>3</sub> and NaHCO<sub>3</sub> and adjusted using 1.0 M NaOH. All chemicals employed were of analytical grade, and the experimental solutions were prepared with ultrapure water from the Millipore system (18.2 MΩ•cm<sup>-1</sup>). All analytical grade chemicals received were from standard suppliers and were not further purified.

## Instruments

The CL emissions were recorded using a BPCL ultraweak chemiluminescence analyzer (Institute of Biophysics, Chinese Academy of Sciences) equipped with a high-precision peristaltic sampler BT100M (Baoding Chuang Rui Precision Pump Co., Ltd.) operated within a flow injection analysis-CL system (FIA-CL). A home-made three-channel CL flow cell was placed in a dark box of the luminescent analyzer. The CL emission signals were detected by a photomultiplier tube (PMT, Hamamatsu CR-131), set at -500 V working voltage and then recorded to a computer equipped with a data acquisition interface.

Ultraviolet-visible (UV-Vis) absorption spectra were collected using a UV1800 UV-Vis spectrometer (Shimadzu, Japan). The CL emission spectrum was measured with an RF-5301PC spectrofluorometer (SHIMADZU, Japan) operated at a 1.5 nm slit-width in high-speed scanning mode after switching into CL mode, and the excitation wavelength was set to 350 nm to record the CL intensities. The morphology of the sample crystals was examined using scanning electron microscopy (SEM, JEOL JSM-6700F) and a Field emission transmission electron microscope (FETEM, Hitachi H-600, Japan) operated at 5.0 kV and 100 kV, respectively. X-ray photoemission spectroscopy (XPS) spectra were measured using a ThermoFisher ESCALAB Xi+ spectrometer equipped with an Al Kα X-ray source. The X-ray diffraction patterns of powder samples were measured using a Bruker D8 ADVANCE diffractometer equipped with Cu Kα (λ = 0.154 nm) radiation filter.

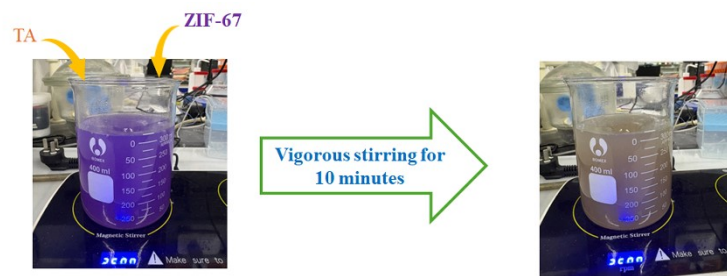

**Scheme S1.** Digitally captured images showing the chemical etching procedure for ZIF-67 MOF modification.

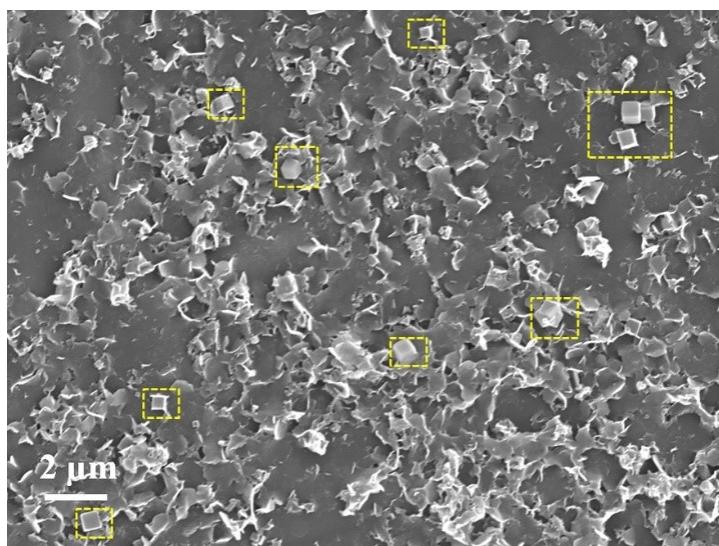

**Fig. S1** SEM images of TA-Co complex NBs.

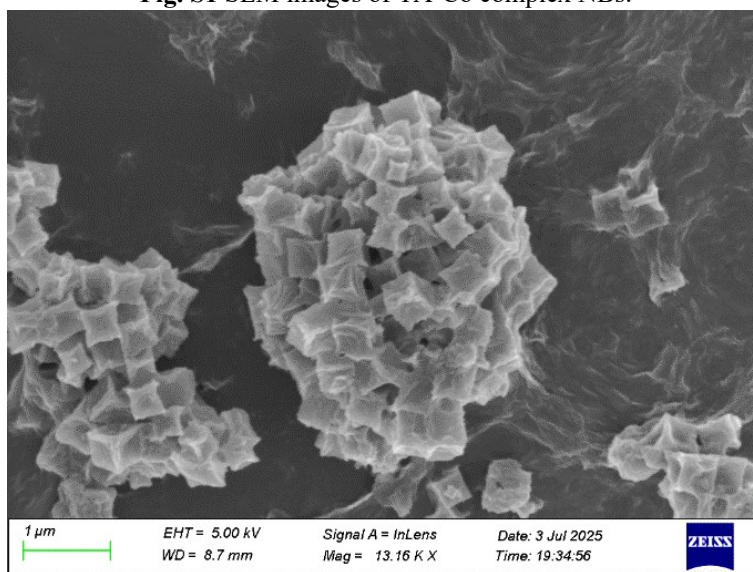

**Fig. S2** SEM images for TA-unmodified  $\text{Co}_3\text{O}_4$ .

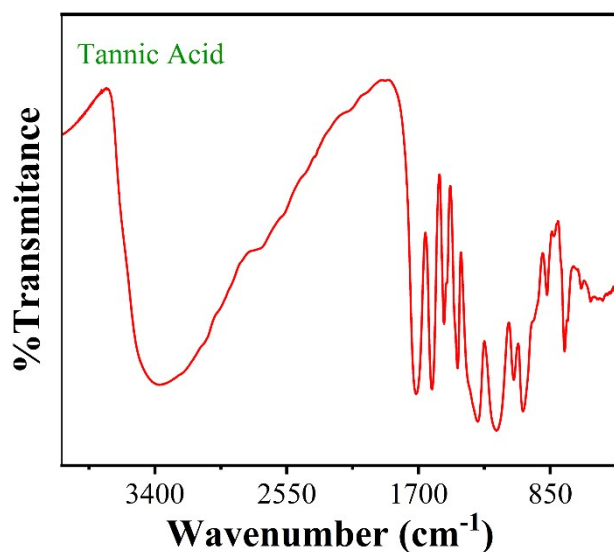

Fig. S3 FT-IR spectrum of TA.

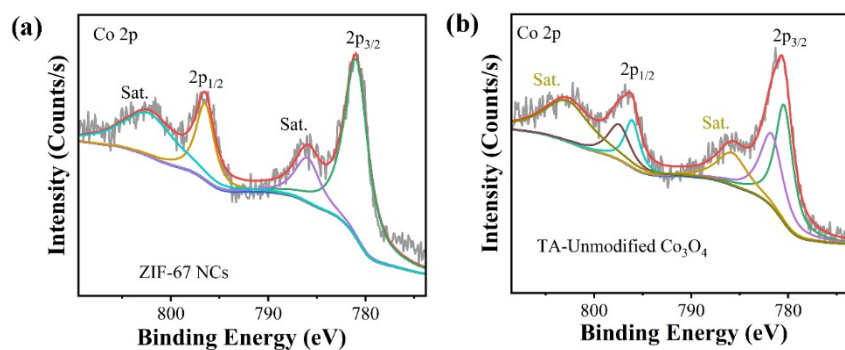

Fig. S4 Co 2p high-resolution XPS deconvoluted spectra of (a) ZIF-67 NCs and (b) TA-unmodified  $\text{Co}_3\text{O}_4$ .

### Optimisation of Chemiluminescence Conditions

The CL signal intensity was examined across variable pH levels ranging from 9.2 to 11.5 (Fig. S4a). The CL signal increased with rising pH and slowly declined after pH 10.5. This increase in signal results from luminol deprotonation at higher pH and may generate side reaction products at extreme pH levels, potentially quenching the CL intensity. The effect of  $\text{H}_2\text{O}_2$  concentrations on the CL signal was also analyzed (Fig. S4b). The CL signal increased from 10 to 50  $\mu\text{M}$   $\text{H}_2\text{O}_2$  but appeared to change slope after 50  $\mu\text{M}$ . Meanwhile, the background signal was higher, making it difficult to produce reproducible CL signals. Therefore, 50  $\mu\text{M}$   $\text{H}_2\text{O}_2$  was chosen as the optimal test condition for subsequent analysis. Additionally, luminol is the rate-determining reagent in the CL reaction. The signal strength increased with a similar slope up to 5  $\mu\text{M}$  luminol and showed minimal change after 10  $\mu\text{M}$ , indicating that 5  $\mu\text{M}$  is the optimal luminol concentration for the test condition (Fig. S4c). Finally, we examined the effect of  $\text{Co}_3\text{O}_4$  NBs nanozyme concentration on the luminol/ $\text{H}_2\text{O}_2$  CL system (Fig. S4d). The signal intensity increased as the material concentration increased. However, the signal gradually levelled after 15  $\mu\text{g/mL}$ , as the optimal diffusion of reagents into the exposed surface active sites is reached. Therefore, the optimized test conditions are pH 10.5, 50  $\mu\text{M}$   $\text{H}_2\text{O}_2$ , 5  $\mu\text{M}$  luminol, and 15  $\mu\text{g/mL}$   $\text{Co}_3\text{O}_4$  NBs.

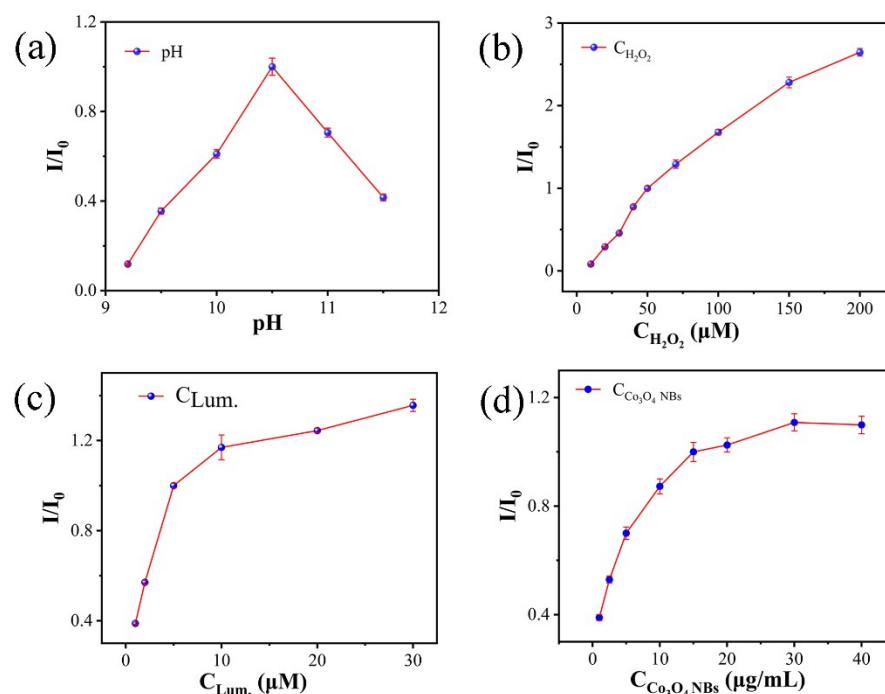

**Fig. S5** Optimization of experimental conditions. (a) optimisation of pH (the concentration of  $H_2O_2$ , luminol and  $Co_3O_4$  NBs were 50  $\mu M$ , 10  $\mu M$  and 15  $\mu g/mL$  respectively,  $n=3$ ), (b) optimisation of  $H_2O_2$  concentrations (pH, the concentration of  $H_2O_2$  and  $Co_3O_4$  NBs were 10.5, 10  $\mu M$  and 15  $\mu g/mL$  respectively,  $n=3$ ), (c) optimisation of luminol concentrations (pH and the concentration of  $H_2O_2$  and  $Co_3O_4$  NBs were 10.5, 50  $\mu M$  and 15  $\mu g/mL$  respectively,  $n=3$ ), (d) optimisation of  $Co_3O_4$  NBs dosage (pH, the concentration of  $H_2O_2$ , and luminol were 10.5, 50  $\mu M$  and 5  $\mu M$  respectively,  $n=3$ ).

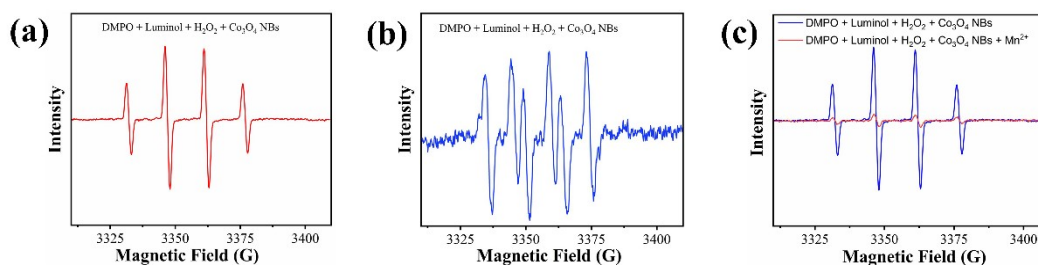

**Fig. S6** Electron spin resonance (ESR) spectra of (a)  $DMPO \cdot OH$  for luminol/ $H_2O_2$ / $Co_3O_4$  NBs, (b)  $DMPO-O_2^{\cdot-}$  for luminol/ $H_2O_2$ / $Co_3O_4$  NBs, and (c)  $DMPO \cdot OH$  for luminol/ $H_2O_2$ / $Co_3O_4$  NBs in the absence of  $Mn^{2+}$  (blue line) and in the presence of  $Mn^{2+}$  (red line). Conditions: DMPO (20 mM), luminol (5  $\mu M$ ),  $H_2O_2$  (50  $\mu M$ ),  $Co_3O_4$  NBs (15  $\mu g/mL$ ) and  $Mn^{2+}$  (20  $\mu M$ ).

**Table S1.** Detection of Mn<sup>2+</sup> ion in real drinking water samples.

| <b>Sample</b>         | <b>Concentration (μM)</b> |          | <b>Recovery (%)</b> | <b>RSD (%), n=3</b> |
|-----------------------|---------------------------|----------|---------------------|---------------------|
| <b>Drinking water</b> | Spiked                    | Detected |                     |                     |
|                       | 0                         | ND       | -                   | -                   |
|                       | 0.5                       | 0.487    | 97.40               | <b>0.71</b>         |
|                       | 0.8                       | 0.869    | 108.6               | <b>4.7</b>          |
|                       | 1.5                       | 1.34     | 89.5                | <b>1.8</b>          |
